# Supplementary material
Source: Springer Nature journal article supplement (https://www.springermedizin.de/resource/supplementary/12887_2013_1052_MOESM2_ESM.pdf/9476390)

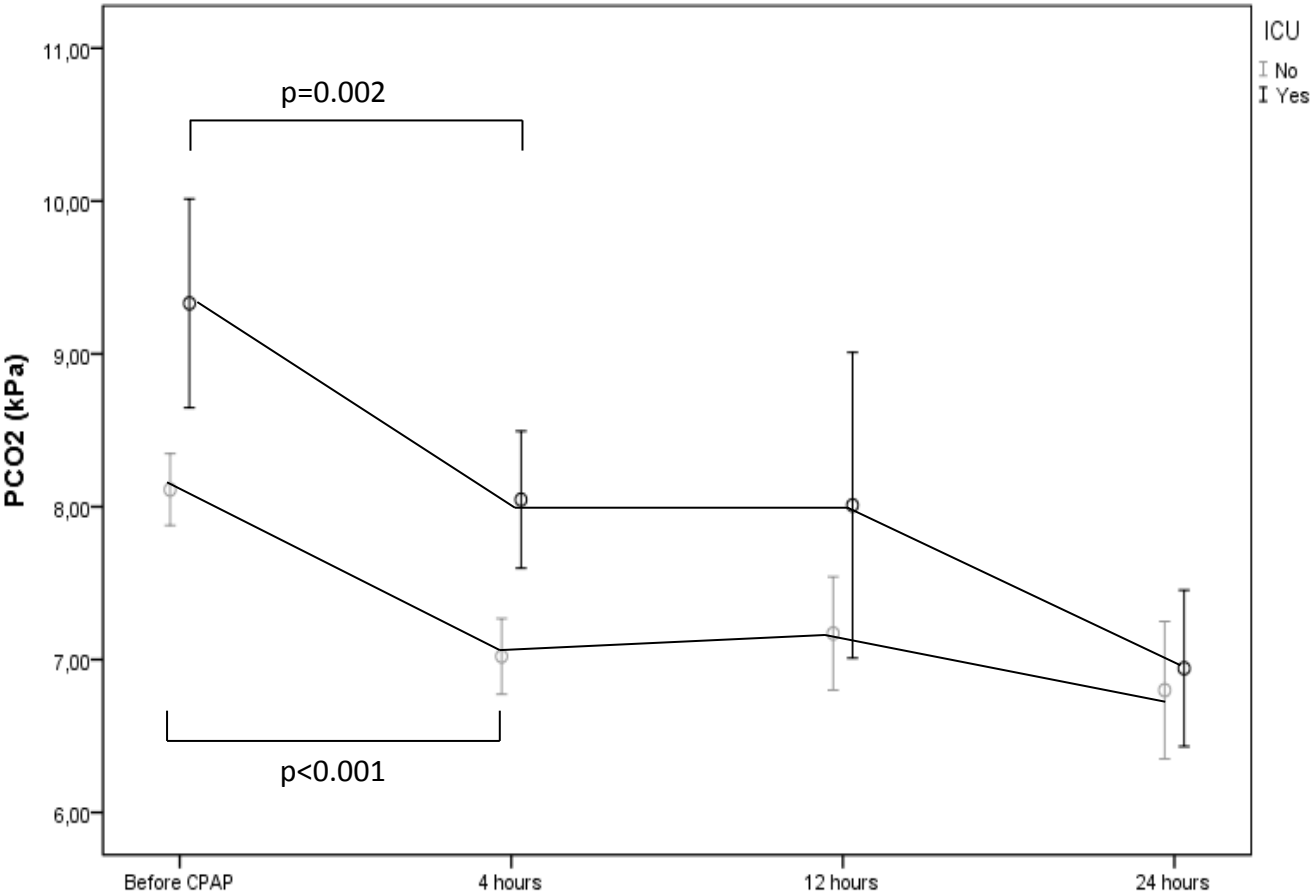

Supplement: MOESM2 [file 9476390]
